# Supplementary material for: PATH-SURVEYOR: pathway level survival enquiry for immuno-oncology and drug repurposing
Source: PubMed Central journal article supplement (PMC10303868; doi:10.1186/s12859-023-05393-y), 2023-06-28
Supplement: 12859_2023_5393_MOESM2_ESM.pdf [file 12859_2023_5393_MOESM2_ESM.pdf]

# Supplementary Figure S2.

A

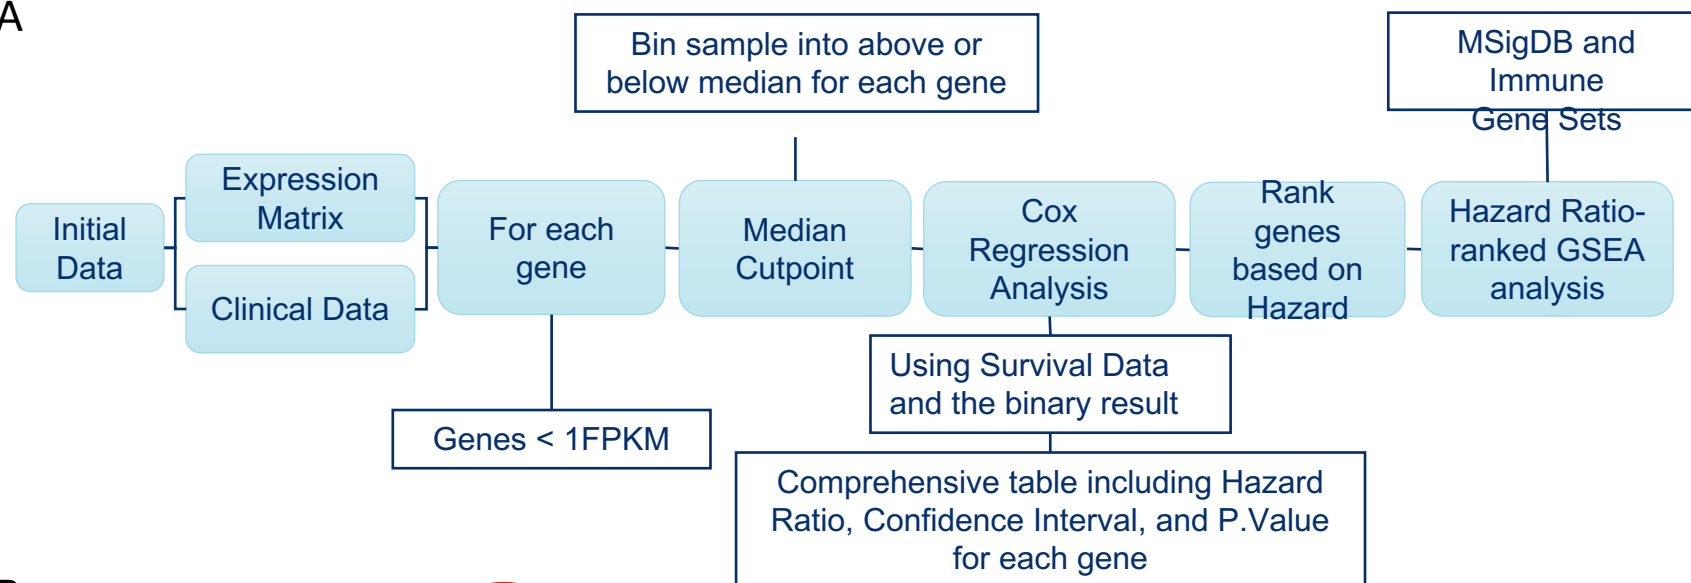

B

{ Hazard Ratio Ranked GSEA } Enrichment Table **Enrichment Plot** 5

Please note this may take excess time depending on the number of gene sets being analyzed.

Upload Ranked Gene List 1  
 Browse... ICI\_Atlas\_Skin\_Pre\_OS\_G...  
 Upload complete  
 GSEA Adj Pvalue Cutoff: 1  
 Set Seed: 101 3  
 Choose Specimen Type:  Human  Mouse 2  
 Choose Gene Set: MSigDB - Hallmark  
 Upload Gene Set  
 Preview Selected Gene Set

Show 25 entries 4

| ID                                 | Description | setSize  | enrichmentScore | NES     | pvalue | p.adjust | qvalues | rank        | lead |
|------------------------------------|-------------|----------|-----------------|---------|--------|----------|---------|-------------|------|
| HALLMARK.INTERFERON.GAMMA.RESPONSE |             | 194.0000 | 0.5413          | 4.5399  | 0.0000 | 0.0000   | 0.0000  | 4,974.0000  |      |
| HALLMARK.ALLOGRAFT.REJECTION       |             | 189.0000 | 0.5008          | 4.1804  | 0.0000 | 0.0000   | 0.0000  | 3,493.0000  |      |
| HALLMARK.INTERFERON.ALPHA.RESPONSE |             | 96.0000  | 0.5347          | 3.8982  | 0.0000 | 0.0000   | 0.0000  | 6,067.0000  |      |
| HALLMARK.MYC.TARGETS.V1            |             | 200.0000 | -0.2831         | -5.4371 | 0.0000 | 0.0000   | 0.0000  | 10,041.0000 |      |
| HALLMARK.INFLAMMATORY.RESPONSE     |             | 200.0000 | 0.3552          | 2.9944  | 0.0000 | 0.0000   | 0.0000  | 5,555.0000  |      |
| HALLMARK.COMPLEMENT                |             | 200.0000 | 0.3427          | 2.8886  | 0.0000 | 0.0000   | 0.0000  | 5,445.0000  |      |
| HALLMARK.IL6.JAK.STAT3.SIGNALING   |             | 87.0000  | 0.4513          | 3.2072  | 0.0000 | 0.0000   | 0.0000  | 2,992.0000  |      |
| HALLMARK.IL2.STAT5.SIGNALING       |             | 199.0000 | 0.2954          | 2.4878  | 0.0000 | 0.0000   | 0.0000  | 5,601.0000  |      |
| HALLMARK.TNFA.SIGNALING.VIA.NFKB   |             | 200.0000 | 0.2873          | 2.4215  | 0.0000 | 0.0000   | 0.0000  | 5,642.0000  |      |
| HALLMARK.KRAS.SIGNALING.UP         |             | 200.0000 | 0.2674          | 2.2542  | 0.0000 | 0.0000   | 0.0000  | 3,869.0000  |      |
| HALLMARK.E2F.TARGETS               |             | 200.0000 | -0.1252         | -2.4051 | 0.0001 | 0.0003   | 0.0002  | 14,644.0000 |      |

C

{ Hazard Ratio Ranked GSEA } Enrichment Table **Enrichment Plot**

Select Gene Set:  
 Show 20 entries  
 Search:

| ID                                         | NES     | pvalue |
|--------------------------------------------|---------|--------|
| HALLMARK.INTERFERON.GAMMA.RESPONSE         | 4.5399  | 0.0000 |
| HALLMARK.ALLOGRAFT.REJECTION               | 4.1804  | 0.0000 |
| HALLMARK.INTERFERON.ALPHA.RESPONSE         | 3.8982  | 0.0000 |
| HALLMARK.MYC.TARGETS.V1                    | -5.4371 | 0.0000 |
| HALLMARK.INFLAMMATORY.RESPONSE             | 2.9944  | 0.0000 |
| HALLMARK.COMPLEMENT                        | 2.8886  | 0.0000 |
| HALLMARK.IL6.JAK.STAT3.SIGNALING           | 3.2072  | 0.0000 |
| HALLMARK.IL2.STAT5.SIGNALING               | 2.4878  | 0.0000 |
| HALLMARK.TNFA.SIGNALING.VIA.NFKB           | 2.4215  | 0.0000 |
| HALLMARK.KRAS.SIGNALING.UP                 | 2.2542  | 0.0000 |
| HALLMARK.E2F.TARGETS                       | -2.4051 | 0.0001 |
| HALLMARK.DNA.REPAIR                        | -2.1093 | 0.0011 |
| HALLMARK.APOPTOSIS                         | 1.8783  | 0.0013 |
| HALLMARK.APICAL.JUNCTION                   | 1.8916  | 0.0038 |
| HALLMARK.EPITHELIAL.MESENCHYMAL.TRANSITION | 1.7579  | 0.0037 |
| HALLMARK.KRAS.SIGNALING.DN                 | 1.6751  | 0.0046 |
| HALLMARK.XENOBIOTIC.METABOLISM             | 1.7073  | 0.0059 |
| HALLMARK.UV.RESPONSE.DN                    | 1.6848  | 0.0087 |
| HALLMARK.COAGULATION                       | 1.6737  | 0.0093 |
| HALLMARK.G2M.CHECKPOINT                    | -1.5258 | 0.0141 |

GSEA Enrichment Plot  
 NES: 4.53985746689279  
 Pvalue: 2.50651317803591e-40

2 HALLMARK.INTERFERON.GAMMA.RESPONSE

Running Enrichment Score

Ranked List Metric

Rank in Ordered Dataset

Download as SVG Download as PDF

Leading Edge Genes  
 Download Leading Edge Gene Table

Search:

| Leading_Edge_Rank | Gene_Symbol | Hazard_Ratio |
|-------------------|-------------|--------------|
| 137               | ADAR        | 1.14         |
| 28                | APOL6       | 1.56         |
| 39                | B2M         | 1.52         |

3

**Supplementary Figure S2.** A) Schematic workflow of gene-level survival analysis followed by hazard ratio gene set enrichment analysis. With the input data of an expression matrix, clinical data. Patients were binned into categories of above and below the median for each gene expression level. A cox regression analysis was performed on each gene expression to generate a comprehensive table of gene sets to filter according to significant, high-risk patients (hazard ratio > 1, p.value < 0.05). GSEA was then performed in MsigDB and Immune Gene Sets. B) Hazard Ratio Ranked GSEA User Interface: 1) The user must upload the output derived from pipeline mode of the Cox regression analysis pipeline. 2) Next select the gene set pathway database to use for performing the GSEA on their data. 3) A seed can be set to ensure reproducibility. 4) The page will load and then present the enriched signatures table. 5) The enriched pathways can be visualized in the “Enrichment Plot” tab. C) Hazard Ratio Ranked GSEA User Interface: 1) The user can select pathways from the enrichment table that was derived. 2) These pathways as well as their normalized enrichment score and Pvalue can be visualized and downloaded. 3) The user can view the leading-edge genes ranked from the pathway they are visualizing.
