# Supplementary material for: PATH-SURVEYOR: pathway level survival enquiry for immuno-oncology and drug repurposing
Source: PubMed Central journal article supplement (PMC10303868; doi:10.1186/s12859-023-05393-y), 2023-06-28
Supplement: 12859_2023_5393_MOESM3_ESM.pdf [file 12859_2023_5393_MOESM3_ESM.pdf]

## Supplementary Figure S3.

A

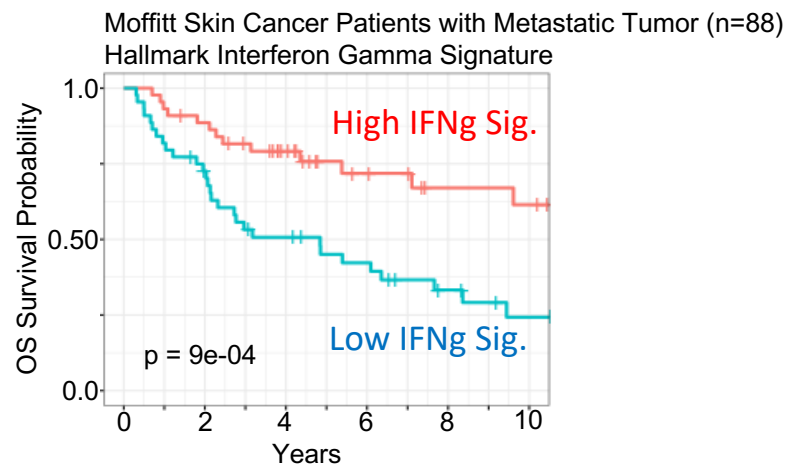

B

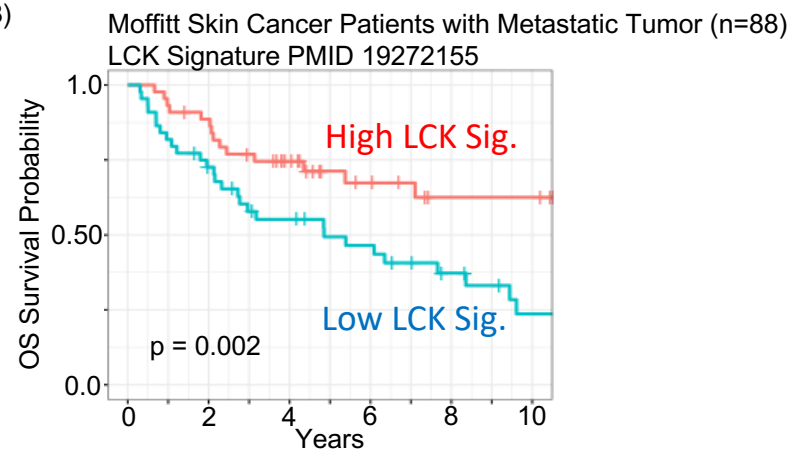

C

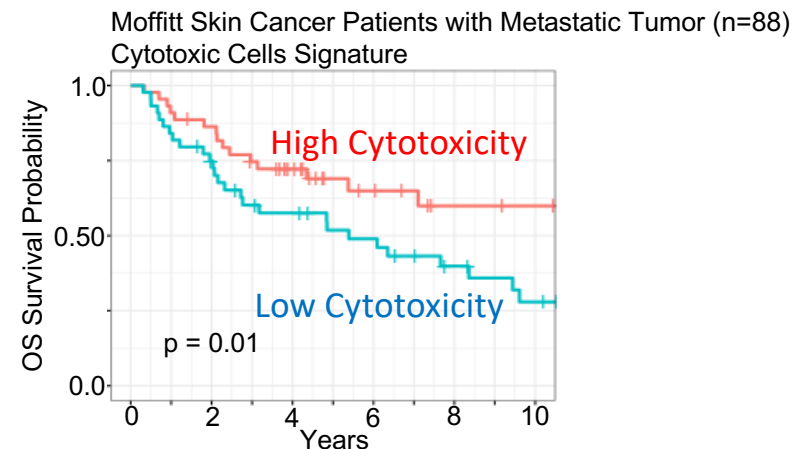

**Supplementary Figure S3.** Survival analysis in Moffitt Skin Cancer Patients with metastatic tumors. Interferon Gamma (A), the LCK Signature (B), and the Cytotoxic signature (C) were found to be associated with low-risk patients based on GSEA. Kaplan Meier curves showing patients dichotomized based on ssGSEA immune signatures are shown on the right.
