# Supplementary material for: PATH-SURVEYOR: pathway level survival enquiry for immuno-oncology and drug repurposing
Source: PubMed Central journal article supplement (PMC10303868; doi:10.1186/s12859-023-05393-y), 2023-06-28
Supplement: 12859_2023_5393_MOESM4_ESM.pdf [file 12859_2023_5393_MOESM4_ESM.pdf]

# Supplementary Figure S4.

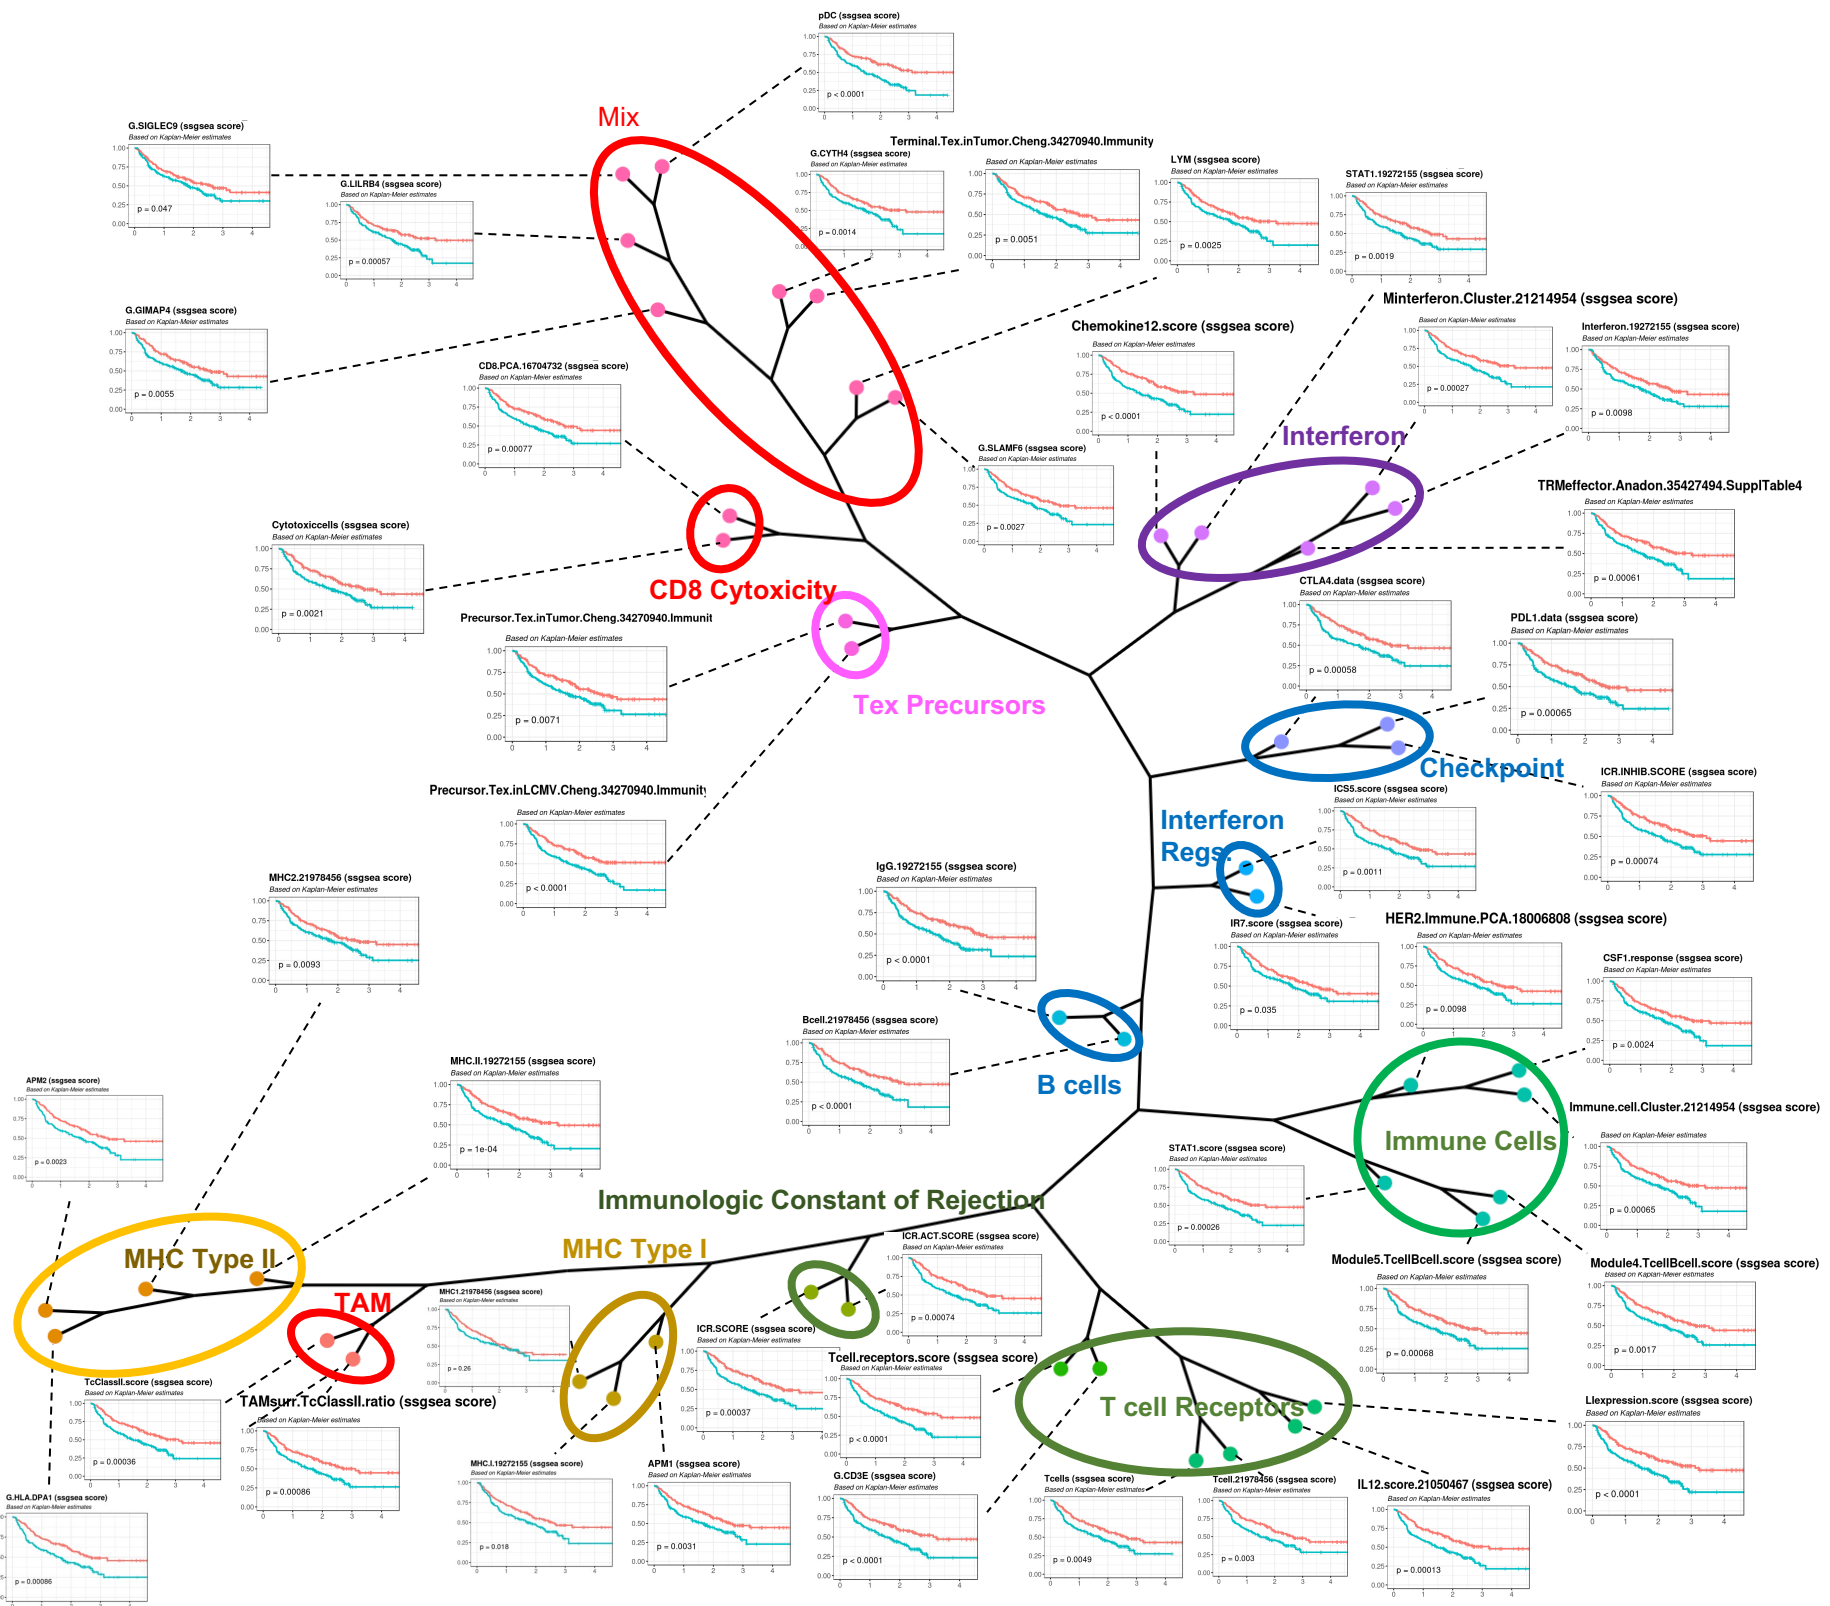

**Supplementary Figure S4.** 12 Immune Hubs associated with a favorable outcome in skin cancer patients treated with ICI. Pathways were clustered by a Jaccard distance calculated based on overlapping genes. Major immune categories were individually circled.
